# Supplementary material for: Selection of a compatible electron transport layer and hole transport layer for the mixed perovskite FA0.85Cs0.15Pb (I0.85Br0.15)3, towards achieving novel structure and high-efficiency perovskite solar cells: a detailed numerical study by SCAPS-1D
Source: PubMed Central journal article supplement (PMC10246436; doi:10.1039/d3ra02170j), 2023-06-07
Supplement: RA-013-D3RA02170J-s001.pdf [file RA-013-D3RA02170J-s001.pdf]

*Electronic supplementary information (ESI)*

**Selection of Compatible Electron Transport Layer and Hole Transport Layer  
for the mixed perovskite  $\text{FA}_{0.85}\text{Cs}_{0.15}\text{Pb}(\text{I}_{0.85}\text{Br}_{0.15})_3$ , Towards Achieving Novel  
Structure and High-efficiency Perovskite Solar Cells: A Detailed Numerical  
Study by SCAPS-1D**

Md. Bulu Rahman<sup>1</sup>, Noor-E-Ashrafi<sup>1</sup>, Md. Helal Miah<sup>1\*</sup>, Mayeen Uddin Khandaker<sup>2</sup>, Mohammad Aminul Islam<sup>3,\*</sup>

<sup>1</sup>Department of Physics, Bangabandhu Sheikh Mujibur Rahman Science and Technology University, 8100 Gopalganj, Bangladesh

<sup>2</sup>Centre for Applied Physics and Radiation Technologies, School of Engineering and Technology, 12 Sunway University, 47500 Bandar Sunway, Selangor, Malaysia

<sup>3</sup>Department of Electrical Engineering, Faculty of Engineering, University of Malaya, Jalan Universiti, 50603 Kuala Lumpur, Malaysia

\*Corresponding author: [aminul.islam@um.edu.my](mailto:aminul.islam@um.edu.my); [helalphydu@bsmrstu.edu.bd](mailto:helalphydu@bsmrstu.edu.bd)

**Table TSI 01: 42 Structures and their PPs**

| Name of the structure                                                                                                                               | V <sub>oc</sub> (V) | J <sub>sc</sub> (mA/cm <sup>2</sup> ) | FF (%) | η (%) |
|-----------------------------------------------------------------------------------------------------------------------------------------------------|---------------------|---------------------------------------|--------|-------|
| FTO/ SnO <sub>2</sub> / FA <sub>0.85</sub> Cs <sub>0.15</sub> Pb (I <sub>0.85</sub> Br <sub>0.15</sub> ) <sub>3</sub> / Spiro- OMeTAD/Au (S1)       | 0.96                | 20.09                                 | 53.84  | 14.12 |
| FTO/ SnO <sub>2</sub> / FA <sub>0.85</sub> Cs <sub>0.15</sub> Pb (I <sub>0.85</sub> Br <sub>0.15</sub> ) <sub>3</sub> / P3HT /Au (S2)               | 0.94                | 12.15                                 | 24.28  | 3.76  |
| FTO/ SnO <sub>2</sub> / FA <sub>0.85</sub> Cs <sub>0.15</sub> Pb (I <sub>0.85</sub> Br <sub>0.15</sub> ) <sub>3</sub> / CuO /Au (S3)                | 0.85                | 23.23                                 | 58.68  | 15.73 |
| FTO/ SnO <sub>2</sub> / FA <sub>0.85</sub> Cs <sub>0.15</sub> Pb (I <sub>0.85</sub> Br <sub>0.15</sub> ) <sub>3</sub> / Cu <sub>2</sub> O /Au (S4)  | 1.09                | 20.42                                 | 64.60  | 19.64 |
| FTO/ SnO <sub>2</sub> / FA <sub>0.85</sub> Cs <sub>0.15</sub> Pb (I <sub>0.85</sub> Br <sub>0.15</sub> ) <sub>3</sub> / CuI /Au (S5)                | 1.01                | 20.13                                 | 56.67  | 15.67 |
| FTO/ SnO <sub>2</sub> / FA <sub>0.85</sub> Cs <sub>0.15</sub> Pb (I <sub>0.85</sub> Br <sub>0.15</sub> ) <sub>3</sub> / MoO <sub>3</sub> /Au (S6)   | 1.08                | 20.19                                 | 68.84  | 20.40 |
| FTO/PCBM/ FA <sub>0.85</sub> Cs <sub>0.15</sub> Pb (I <sub>0.85</sub> Br <sub>0.15</sub> ) <sub>3</sub> / Spiro- OMeTAD/Au (S7)                     | 0.96                | 16.61                                 | 29.39  | 6.37  |
| FTO/PCBM/ FA <sub>0.85</sub> Cs <sub>0.15</sub> Pb (I <sub>0.85</sub> Br <sub>0.15</sub> ) <sub>3</sub> / P3HT /Au (S8)                             | 0.93                | 8.57                                  | 29.36  | 3.19  |
| FTO/PCBM/ FA <sub>0.85</sub> Cs <sub>0.15</sub> Pb (I <sub>0.85</sub> Br <sub>0.15</sub> ) <sub>3</sub> / CuO /Au (S9)                              | 0.85                | 18.25                                 | 29.45  | 6.23  |
| FTO/PCBM/ FA <sub>0.85</sub> Cs <sub>0.15</sub> Pb (I <sub>0.85</sub> Br <sub>0.15</sub> ) <sub>3</sub> / Cu <sub>2</sub> O /Au (S10)               | 1.09                | 19.36                                 | 30.68  | 8.83  |
| FTO/PCBM/ FA <sub>0.85</sub> Cs <sub>0.15</sub> Pb (I <sub>0.85</sub> Br <sub>0.15</sub> ) <sub>3</sub> / CuI /Au (S11)                             | 1.01                | 17.52                                 | 29.16  | 7.01  |
| FTO/PCBM/ FA <sub>0.85</sub> Cs <sub>0.15</sub> Pb (I <sub>0.85</sub> Br <sub>0.15</sub> ) <sub>3</sub> / MoO <sub>3</sub> /Au (S12)                | 1.08                | 19.86                                 | 30.71  | 8.95  |
| FTO/ TiO <sub>2</sub> / FA <sub>0.85</sub> Cs <sub>0.15</sub> Pb (I <sub>0.85</sub> Br <sub>0.15</sub> ) <sub>3</sub> / Spiro- OMeTAD /Au (S13)     | 0.97                | 20.18                                 | 59.87  | 16.00 |
| FTO/ TiO <sub>2</sub> / FA <sub>0.85</sub> Cs <sub>0.15</sub> Pb (I <sub>0.85</sub> Br <sub>0.15</sub> ) <sub>3</sub> / P3HT /Au (S14)              | 0.95                | 13.16                                 | 24.65  | 4.20  |
| FTO/ TiO <sub>2</sub> / FA <sub>0.85</sub> Cs <sub>0.15</sub> Pb (I <sub>0.85</sub> Br <sub>0.15</sub> ) <sub>3</sub> / CuO /Au (S15)               | 0.84                | 23.61                                 | 70.75  | 19.19 |
| FTO/ TiO <sub>2</sub> / FA <sub>0.85</sub> Cs <sub>0.15</sub> Pb (I <sub>0.85</sub> Br <sub>0.15</sub> ) <sub>3</sub> / Cu <sub>2</sub> O /Au (S16) | 1.11                | 20.47                                 | 70.58  | 21.77 |
| FTO/ TiO <sub>2</sub> / FA <sub>0.85</sub> Cs <sub>0.15</sub> Pb (I <sub>0.85</sub> Br <sub>0.15</sub> ) <sub>3</sub> / CuI /Au (S17)               | 1.022               | 20.20                                 | 62.63  | 17.60 |
| FTO/ TiO <sub>2</sub> / FA <sub>0.85</sub> Cs <sub>0.15</sub> Pb (I <sub>0.85</sub> Br <sub>0.15</sub> ) <sub>3</sub> / MoO <sub>3</sub> /Au (S18)  | 1.09                | 20.22                                 | 75.13  | 22.58 |
| FTO/ ZnO / FA <sub>0.85</sub> Cs <sub>0.15</sub> Pb (I <sub>0.85</sub> Br <sub>0.15</sub> ) <sub>3</sub> / Spiro- OMeTAD/Au (S19)                   | 0.97                | 20.18                                 | 59.87  | 16.00 |
| FTO/ ZnO / FA <sub>0.85</sub> Cs <sub>0.15</sub> Pb (I <sub>0.85</sub> Br <sub>0.15</sub> ) <sub>3</sub> / P3HT /Au (S20)                           | 0.95                | 13.16                                 | 24.65  | 4.20  |
| FTO/ ZnO / FA <sub>0.85</sub> Cs <sub>0.15</sub> Pb (I <sub>0.85</sub> Br <sub>0.15</sub> ) <sub>3</sub> / CuO /Au (S21)                            | 0.84                | 23.61                                 | 70.75  | 19.19 |
| FTO/ ZnO / FA <sub>0.85</sub> Cs <sub>0.15</sub> Pb (I <sub>0.85</sub> Br <sub>0.15</sub> ) <sub>3</sub> / Cu <sub>2</sub> O /Au (S22)              | 1.11                | 20.47                                 | 70.58  | 21.77 |
| FTO/ ZnO / FA <sub>0.85</sub> Cs <sub>0.15</sub> Pb (I <sub>0.85</sub> Br <sub>0.15</sub> ) <sub>3</sub> / CuI /Au (S23)                            | 1.02                | 20.20                                 | 62.63  | 17.60 |
| FTO/ ZnO / FA <sub>0.85</sub> Cs <sub>0.15</sub> Pb (I <sub>0.85</sub> Br <sub>0.15</sub> ) <sub>3</sub> / MoO <sub>3</sub> /Au (S24)               | 1.09                | 20.22                                 | 75.13  | 22.58 |
| FTO/ CdS / FA <sub>0.85</sub> Cs <sub>0.15</sub> Pb (I <sub>0.85</sub> Br <sub>0.15</sub> ) <sub>3</sub> / Spiro- OMeTAD /Au (S25)                  | 0.97                | 20.25                                 | 59.55  | 15.95 |
| FTO/ CdS / FA <sub>0.85</sub> Cs <sub>0.15</sub> Pb (I <sub>0.85</sub> Br <sub>0.15</sub> ) <sub>3</sub> / P3HT /Au (S26)                           | 0.95                | 13.08                                 | 24.59  | 4.16  |
| FTO/ CdS / FA <sub>0.85</sub> Cs <sub>0.15</sub> Pb (I <sub>0.85</sub> Br <sub>0.15</sub> ) <sub>3</sub> / CuO /Au (S27)                            | 0.84                | 23.63                                 | 70.69  | 19.20 |
| FTO/ CdS / FA <sub>0.85</sub> Cs <sub>0.15</sub> Pb (I <sub>0.85</sub> Br <sub>0.15</sub> ) <sub>3</sub> / Cu <sub>2</sub> O /Au (S28)              | 1.11                | 20.51                                 | 70.31  | 21.70 |
| FTO/ CdS / FA <sub>0.85</sub> Cs <sub>0.15</sub> Pb (I <sub>0.85</sub> Br <sub>0.15</sub> ) <sub>3</sub> / CuI /Au (S29)                            | 1.02                | 20.27                                 | 62.32  | 17.56 |
| FTO/ CdS / FA <sub>0.85</sub> Cs <sub>0.15</sub> Pb (I <sub>0.85</sub> Br <sub>0.15</sub> ) <sub>3</sub> / MoO <sub>3</sub> /Au (S30)               | 1.09                | 20.30                                 | 75.03  | 22.60 |
| FTO/ WO <sub>3</sub> / FA <sub>0.85</sub> Cs <sub>0.15</sub> Pb (I <sub>0.85</sub> Br <sub>0.15</sub> ) <sub>3</sub> / Spiro- OMeTAD/Au (S31)       | 0.97                | 20.21                                 | 59.89  | 16.03 |
| FTO/ WO <sub>3</sub> / FA <sub>0.85</sub> Cs <sub>0.15</sub> Pb (I <sub>0.85</sub> Br <sub>0.15</sub> ) <sub>3</sub> / P3HT /Au (S32)               | 0.95                | 13.17                                 | 24.66  | 4.21  |
| FTO/ WO <sub>3</sub> / FA <sub>0.85</sub> Cs <sub>0.15</sub> Pb (I <sub>0.85</sub> Br <sub>0.15</sub> ) <sub>3</sub> / CuO /Au (S33)                | 0.84                | 23.62                                 | 70.79  | 19.21 |
| FTO/ WO <sub>3</sub> / FA <sub>0.85</sub> Cs <sub>0.15</sub> Pb (I <sub>0.85</sub> Br <sub>0.15</sub> ) <sub>3</sub> / Cu <sub>2</sub> O /Au (S34)  | 1.11                | 20.48                                 | 70.59  | 21.79 |
| FTO/ WO <sub>3</sub> / FA <sub>0.85</sub> Cs <sub>0.15</sub> Pb (I <sub>0.85</sub> Br <sub>0.15</sub> ) <sub>3</sub> / CuI /Au (S35)                | 1.02                | 20.22                                 | 62.64  | 17.63 |
| FTO/ WO <sub>3</sub> / FA <sub>0.85</sub> Cs <sub>0.15</sub> Pb (I <sub>0.85</sub> Br <sub>0.15</sub> ) <sub>3</sub> / MoO <sub>3</sub> /Au (S36)   | 1.09                | 20.25                                 | 75.12  | 22.61 |
| FTO/ WS <sub>2</sub> / FA <sub>0.85</sub> Cs <sub>0.15</sub> Pb (I <sub>0.85</sub> Br <sub>0.15</sub> ) <sub>3</sub> / Spiro- OMeTAD/Au (S37)       | 0.97                | 20.66                                 | 59.69  | 16.36 |
| FTO/ WS <sub>2</sub> / FA <sub>0.85</sub> Cs <sub>0.15</sub> Pb (I <sub>0.85</sub> Br <sub>0.15</sub> ) <sub>3</sub> / P3HT /Au (S38)               | 0.95                | 13.28                                 | 24.63  | 4.24  |
| FTO/ WS <sub>2</sub> / FA <sub>0.85</sub> Cs <sub>0.15</sub> Pb (I <sub>0.85</sub> Br <sub>0.15</sub> ) <sub>3</sub> / CuO /Au (S39)                | 0.85                | 23.78                                 | 71.16  | 19.45 |
| FTO/ WS <sub>2</sub> / FA <sub>0.85</sub> Cs <sub>0.15</sub> Pb (I <sub>0.85</sub> Br <sub>0.15</sub> ) <sub>3</sub> / Cu <sub>2</sub> O /Au (S40)  | 1.11                | 20.87                                 | 70.41  | 22.16 |
| FTO/ WS <sub>2</sub> / FA <sub>0.85</sub> Cs <sub>0.15</sub> Pb (I <sub>0.85</sub> Br <sub>0.15</sub> ) <sub>3</sub> / CuI /Au (S41)                | 1.02                | 20.68                                 | 62.47  | 18.00 |
| FTO/ WS <sub>2</sub> / FA <sub>0.85</sub> Cs <sub>0.15</sub> Pb (I <sub>0.85</sub> Br <sub>0.15</sub> ) <sub>3</sub> / MoO <sub>3</sub> /Au (S42)   | 1.09                | 20.71                                 | 74.93  | 23.10 |
|                                                                                                                                                     |                     |                                       |        |       |

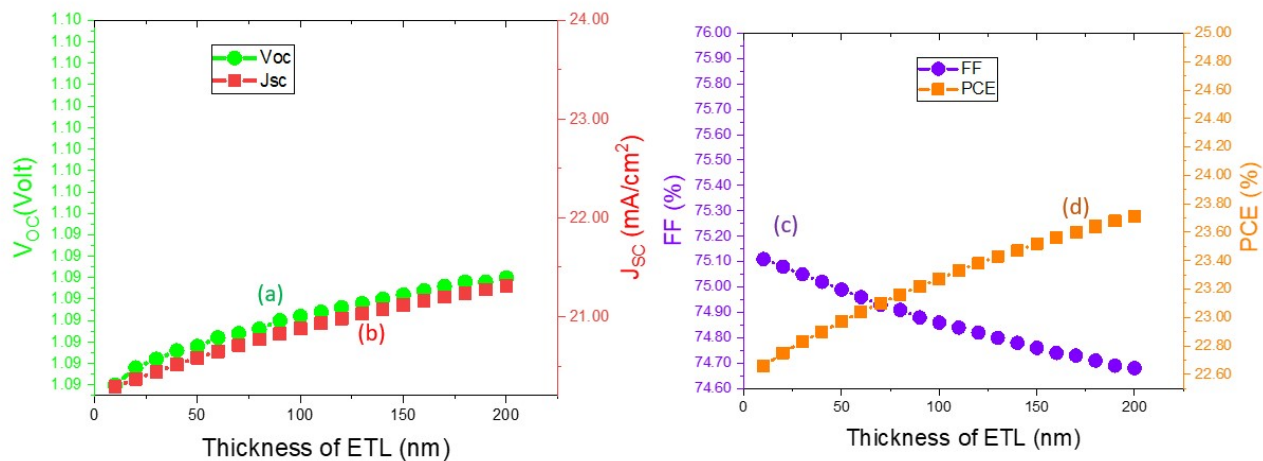

**Figure FSI 01 :** Variation of PPs owing to changing of ETL thickness

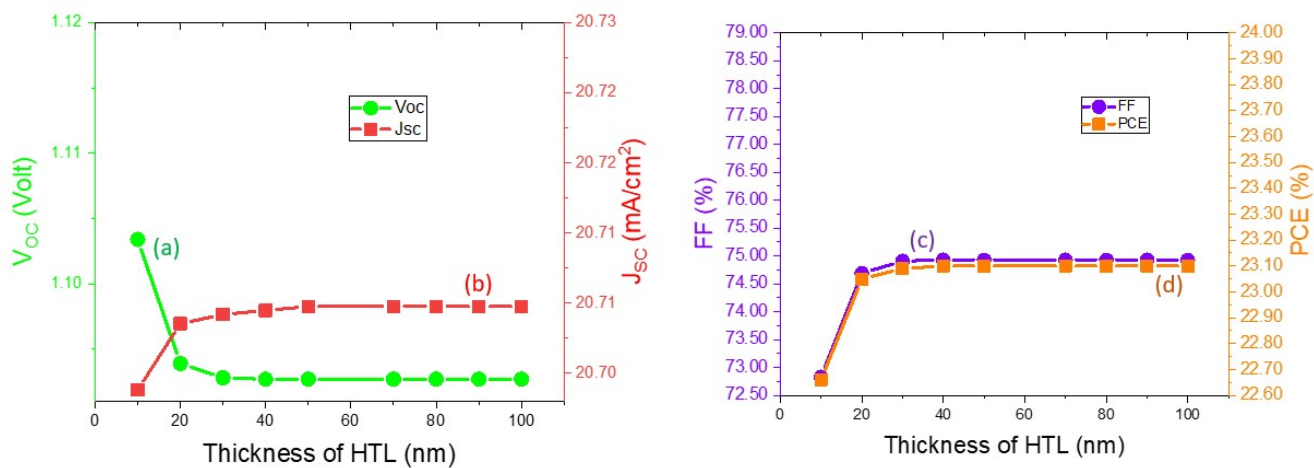

**Figure FSI 02 :** Alteration of PPs due to changing of HTL thickness
